# Supplementary material for: Development and Validation of a Model to Identify Critical Brain Injuries Using Natural Language Processing of Text Computed Tomography Reports
Source: PubMed Central journal article supplement (PMC9382443; doi:10.1001/jamanetworkopen.2022.27109), 2022-08-16
Supplement: jamanetwopen-e2227109-s001.pdf [file jamanetwopen-e2227109-s001.pdf]

## Supplemental Online Content

Torres-Lopez VM, Rovenolt GE, Olcese AJ, et al. Development and validation of a model to identify critical brain injuries using natural language processing of text computed tomography reports. *JAMA Netw Open.* 2022;5(8):e2227109.  
doi:10.1001/jamanetworkopen.2022.27109

**eTable 1.** Demographic Characteristics of Patients With Head CT Reports in the Yale Acute Brain Biorepository

**eTable 2.** Data Dictionary Individual Entity Category Performances

**eTable 3.** Wide- and Long-Format NER Model Output

**eTable 4.** Decoder Performance Confusion Matrix

This supplemental material has been provided by the authors to give readers additional information about their work.

**eTable 1.** Demographic Characteristics of Patients With Head CT Reports in the Yale Acute Brain Biorepository

|                                 | <b>N</b>     |              |
|---------------------------------|--------------|--------------|
| <b>Patients</b>                 | 1152         |              |
| <b>Age (mean (SD))</b>          | 67.6 (16.1)  |              |
| <b>Sex (%)</b>                  |              |              |
| Male                            | 586 (52%)    |              |
| Female                          | 537 (48.0 %) |              |
| <b>Ethnicity (%)</b>            |              |              |
| Non- Hispanic                   | 1000 (92.3%) |              |
| Hispanic                        | 75 (6.9%)    |              |
| <b>Race (%)</b>                 |              |              |
| White                           | 796 (73.7%)  |              |
| Black or African American       | 164 (15.2%)  |              |
| Asian                           | 28 (2.6%)    |              |
| Pacific Islander                | 0 (0.0%)     |              |
| American Indian/ Alaskan Native | 0 (0.0%)     |              |
| Other                           | 55 (5.1%)    |              |
| Unknown                         | 37 (3.4%)    |              |
| <b>Diagnosis (%)</b>            | <b>Yale</b>  | <b>UWisc</b> |
| AIS                             | 566 (50.4%)  | 48 (8.51%)   |
| ICH                             | 366 (29.9%)  | 29 (5.14%)   |
| SAH                             | 112 (10.0%)  | 26 (4.61%)   |
| TIA                             | 43 (3.8%)    | 0            |
| TBI                             | 37 (3.3%)    | 90 (15.96%)  |
| IVH                             | 14 (1.2%)    | 1 (0.18%)    |
| OTH                             | 14 (1.2%)    | 370 (65.60%) |

**eTable 2.** Data Dictionary Individual Entity Category Performances

| <b>Model</b>         | <b>spaCy</b>     |               |                | <b>Transformer</b> |               |                |
|----------------------|------------------|---------------|----------------|--------------------|---------------|----------------|
| <b>Entity</b>        | <b>Precision</b> | <b>Recall</b> | <b>F-score</b> | <b>Precision</b>   | <b>Recall</b> | <b>F-score</b> |
| Atrophy              | 100              | 99.91         | 99.95          | 98.82              | 99.52         | 99.17          |
| Clot                 | 100              | 100           | 100            | 100                | 100           | 100            |
| Compartment-ExtAx    | 99.58            | 100           | 99.79          | 98.20              | 99.46         | 98.83          |
| Compartment-External | 100              | 100           | 100            | 97.01              | 100           | 98.48          |
| Compartment-IntAx    | 99.95            | 99.92         | 99.93          | 99.37              | 99.46         | 99.42          |
| Compartment-Other    | 99.94            | 100           | 99.97          | 99.56              | 99.78         | 99.67          |
| Contusion            | 100              | 100           | 100            | 100                | 100           | 100            |
| Date                 | 99.98            | 99.95         | 99.96          | 99.43              | 99.29         | 99.36          |
| Density-High         | 100              | 100           | 100            | 96.40              | 100           | 98.17          |
| Density-Iso          | 100              | 100           | 100            | 100                | 100           | 100            |
| Density-Low          | 100              | 100           | 100            | 98.39              | 99.73         | 99.06          |
| Density-Mixed        | 100              | 100           | 100            | 87.50              | 87.50         | 87.50          |
| Density-Undiff       | 96.51            | 31.32         | 47.29          | 63.04              | 95.08         | 75.82          |
| Direction            | 99.85            | 99.65         | 99.75          | 98.24              | 99.39         | 98.81          |
| Dur-New              | 97.83            | 100           | 98.90          | 98.03              | 99.44         | 98.74          |
| Dur-Old              | 99.59            | 95.66         | 97.59          | 98.38              | 98.95         | 98.66          |
| Dur-Undiff           | 88.06            | 99.93         | 93.62          | 97.51              | 94.90         | 96.19          |
| Edema                | 100              | 100           | 100            | 100                | 100           | 100            |
| Endl                 | 100              | 99.99         | 99.99          | 94.60              | 99.99         | 97.22          |
| Fluid                | 98.38            | 100           | 99.18          | 98.38              | 98.37         | 98.38          |
| Fracture             | 100              | 100           | 100            | 100                | 100           | 100            |
| Gray-White           | 99.93            | 99.93         | 99.93          | 87.5               | 98.64         | 92.74          |
| Hemorrhage           | 99.99            | 100           | 99.99          | 99.80              | 100           | 99.90          |
| Herniation           | 100              | 100           | 100            | 100                | 99.19         | 99.59          |
| Hydrocephalus        | 99.72            | 99.91         | 99.81          | 94.92              | 98.42         | 96.64          |
| Lam_Necrosis         | 100              | 77.78         | 87.5           | 0                  | 0             | 0              |
| Lesion               | 100              | 96.49         | 98.21          | 99.07              | 99.07         | 99.07          |
| Mag-Better           | 100              | 99.83         | 99.92          | 97.33              | 100           | 98.65          |
| Mag-Large            | 99.45            | 99.89         | 99.68          | 97.27              | 98.166        | 97.72          |
| Mag-Modifier         | 99.76            | 97.70         | 98.72          | 99.77              | 99.32         | 99.54          |
| Mag-Normal           | 95.13            | 96.84         | 95.98          | 99.24              | 100           | 99.62          |
| Mag-Other            | 98.53            | 99.62         | 99.07          | 99.09              | 98.65         | 98.88          |
| Mag-Resolved         | 98.46            | 100           | 99.22          | 100                | 100           | 100            |
| Mag-Same             | 97.62            | 100           | 98.79          | 99.43              | 97.47         | 98.44          |
| Mag-Small            | 98.81            | 99.68         | 99.24          | 99.38              | 99.07         | 99.23          |
| Mag-Worse            | 100              | 99.95         | 99.98          | 97.65              | 99.15         | 98.40          |
| MassEffect           | 98.88            | 100           | 99.44          | 99.05              | 99.52         | 99.29          |
| MidlineShift         | 99.95            | 100           | 99.98          | 98.79              | 98.79         | 98.79          |
| Negation             | 99.97            | 99.73         | 99.85          | 100                | 99.93         | 99.97          |

|                    |       |       |       |       |       |       |
|--------------------|-------|-------|-------|-------|-------|-------|
| Parench-Brainstem  | 100   | 100   | 100   | 93.65 | 100   | 96.72 |
| Parench-Cerebellar | 99.88 | 99.65 | 99.77 | 97.35 | 100   | 98.66 |
| Parench-Cortical   | 100   | 99.75 | 99.88 | 98.58 | 98.58 | 98.58 |
| Parench-Deep       | 100   | 100   | 100   | 99.33 | 100   | 99.66 |
| Pneumocephalus     | 100   | 97.93 | 98.96 | 91.80 | 98.25 | 94.92 |
| Region             | 99.96 | 99.86 | 99.91 | 98.87 | 99.87 | 99.37 |
| Sinus              | 99.44 | 100   | 99.72 | 99.79 | 99.17 | 99.48 |
| Size               | 99.61 | 93.33 | 96.37 | 94.66 | 89.87 | 92.20 |
| SmallVessel        | 100   | 100   | 100   | 100   | 100   | 100   |
| Stroke             | 94.63 | 94.63 | 94.63 | 98.58 | 98.59 | 98.58 |
| Surgical-After     | 99.64 | 89.87 | 94.50 | 89.47 | 100   | 94.44 |
| Surgical-Clip      | 100   | 100   | 100   | 100   | 100   | 100   |
| Surgical-Drain     | 99.18 | 99.43 | 99.30 | 87.95 | 85.88 | 86.90 |
| Surgical-Endo      | 96.36 | 95.83 | 96.09 | 88.46 | 95.83 | 92    |
| Surgical-Hole      | 99.89 | 99.87 | 99.87 | 93.88 | 100   | 96.84 |
| Surgical-Monitor   | 100   | 100   | 100   | 100   | 100   | 100   |
| Surgical-Placement | 92.45 | 100   | 96.08 | 100   | 93.75 | 96.77 |
| Surgical-Removal   | 100   | 100   | 100   | 100   | 100   | 100   |
| Territory          | 99.23 | 99.67 | 99.42 | 99.37 | 98.59 | 98.98 |
| Time               | 87.72 | 99.76 | 93.36 | 94.95 | 98.04 | 96.47 |
| Uncertainty        | 96.69 | 99.96 | 98.30 | 97.15 | 98.84 | 97.99 |
| VascMalform        | 100   | 100   | 100   | 99.31 | 100   | 99.65 |
| Ventricle          | 99.40 | 99.41 | 99.41 | 98.10 | 98.53 | 98.31 |

**eTable 3.** Wide- and Long-Format NER Model Output

|           |             |                    |                 |            |            |               |                  |             |
|-----------|-------------|--------------------|-----------------|------------|------------|---------------|------------------|-------------|
|           |             | <b>Entities</b>    | <b>Val</b>      |            |            |               |                  |             |
| a.        | 0           | Size               | 1 cm            |            |            |               |                  |             |
|           | 1           | Compartment        | epidural        |            |            |               |                  |             |
|           | 2           | Hematoma           | hematoma        |            |            |               |                  |             |
|           | 3           | Loc                | right           |            |            |               |                  |             |
|           | 4           | Loc                | anterior        |            |            |               |                  |             |
|           | 5           | Region             | temporal        |            |            |               |                  |             |
|           | 6           | Magnitude          | stable          |            |            |               |                  |             |
|           | 7           | Endl               | .               |            |            |               |                  |             |
|           |             |                    |                 |            |            |               |                  |             |
|           |             |                    |                 |            |            |               |                  |             |
| <b>b.</b> | <b>Size</b> | <b>Compartment</b> | <b>Hematoma</b> | <b>Loc</b> | <b>Loc</b> | <b>Region</b> | <b>Magnitude</b> | <b>Endl</b> |
|           | 1 cm        | epidural           | hematoma        | right      | anterior   | temporal      | stable           | .           |

**eTable 4.** Decoder Performance Confusion Matrix

|                    | True positive | True possible | True negative |
|--------------------|---------------|---------------|---------------|
| spaCy              |               |               |               |
| Predicted positive | 654           | 3             | 36            |
| Predicted possible | 7             | 8             | 3             |
| Predicted negative | 23            | 26            | 1976          |
| Transformer        |               |               |               |
| Predicted positive | 649           | 3             | 35            |
| Predicted possible | 7             | 8             | 3             |
| Predicted negative | 28            | 26            | 1977          |
